# Supplementary material for: Genetic Liability to Depression and Risk of Coronary Artery Disease, Myocardial Infarction, and Other Cardiovascular Outcomes
Source: PubMed Central journal article supplement — J Am Heart Assoc. 2020 Dec 29;10(1):e017986. doi: 10.1161/JAHA.120.017986 (PMC7955472; doi:10.1161/jaha.120.017986), 2020-12-29
Supplement: JAH3-10-e017986-s001.pdf [file JAH3-10-e017986-s001.pdf]

# **Supplemental Material**

## **Data S1.**

### **Supplemental Methods**

#### **Definition of depression**

##### **1. UK biobank<sup>10</sup>**

- 1) The broad definition of depression was used in the UK Biobank. Measured in a variety of ways:
  - a. *Have you ever seen a general practitioner for nerves, anxiety, tension or depression?*
  - b. *Have you ever seen a psychiatrist for nerves, anxiety, tension or depression?*
- 2) Does not include the participants who were identified with bipolar disorder, schizophrenia, or personality disorder using self-declared data as well as prescriptions for antipsychotic medications.

##### **2. 23andMe\_307k<sup>11</sup>**

- 1) The data were derived from the genome-wide association study results of the discovery 23andMe.
- 2) Depression was defined based on responses to web-based surveys, with individuals that self-reported as having received a clinical diagnosis or treatment for depression classified as cases.

##### **3. PGC\_139k<sup>12</sup>**

- 1) PGC\_139k cohort was obtained from the meta-analysis of major depressive disorder utilizing European-ancestry PGC cohorts with the 23andMe\_307k and the previous UK Biobank cohorts removed.
- 2) Depression was defined based on structured diagnostic interviews, or electronic medical records, with individuals that self-reported as having received a clinical diagnosis or treatment for depression.

**Table S1. Descriptive information of the studies and datasets included in the analyses**

| <b>GWAS</b>                                      | <b>Phenotype</b>                                 | <b>Participants</b>               | <b>Ancestry</b>                  | <b>Use in this MR study</b>    | <b>Adjustments*</b>                       |
|--------------------------------------------------|--------------------------------------------------|-----------------------------------|----------------------------------|--------------------------------|-------------------------------------------|
| Howard et al, 2019 <sup>9</sup>                  | Depression                                       | 246,363 cases<br>561,190 controls | Multi-ancestry                   | Exposure                       | Age, sex, genotype platform               |
| CARDIoGRAMplusC4D <sup>13</sup>                  | CAD/MI                                           | 60,801 cases<br>123,504 controls  | Multi-ancestry<br>(77% European) | Primary outcome                | age, sex                                  |
| Aragam et al, 2018 <sup>14</sup>                 | HF                                               | 6,504 cases<br>387,652 controls   | European                         | Secondary outcome              | age, sex, genotyping platform array       |
| AF HRC <sup>15</sup>                             | AF                                               | 65,446 cases<br>522,744 controls  | Multi-ancestry<br>(91% European) | Secondary outcome              | age, sex                                  |
| MEGASTROKE <sup>16</sup>                         | Any ischemic stroke and subtypes (LAS, SVS, CES) | 34,217 cases<br>404,630 controls  | European                         | Secondary outcome              | age, sex                                  |
| GIANT <sup>27</sup>                              | BMI                                              | 322,154 individuals               | European                         | Confounder in multivariable MR | age, age squared                          |
| GLGC <sup>28</sup>                               | LDL-C, HDL-C, TGL                                | 188,578 individuals               | European                         | Confounder in multivariable MR | age, sex                                  |
| UK Biobank <sup>29</sup><br>(Neale lab analysis) | SBP, DBP, hypertension                           | 317,754 individuals               | European                         | Confounder in multivariable MR | sex                                       |
| DIAGRAM <sup>26</sup>                            | T2D                                              | 34,840 cases<br>114,981 controls  | European<br>Pakistani            | Mediator in mediation analysis | age, sex                                  |
| GSCAN <sup>25</sup>                              | Smoking, alcohol use                             | 1,232,091 individuals             | European                         | Mediator in mediation analysis | age, sex, interaction between age and sex |

\*All GWAS studies have further adjusted for principal components.

*GWAS names:* AF HRC, Atrial Fibrillation Haplotype Reference Consortium; CARDIoGRAMplusC4D, Coronary ARtery DIsease Genome-wide Replication and Meta-analysis (CARDIoGRAM) plus The Coronary Artery Disease (C4D) Genetics; DIAGRAM, DIAbetes Genetics Replication and Meta-analysis; GIANT, Genetic Investigation of Anthropometric Traits; GLGC, global lipids genetics consortium; GSCAN: GWAS & Sequencing Consortium of Alcohol and Nicotine use.

*Phenotypes:* AF, atrial fibrillation; BMI, body mass index; CAD, coronary artery disease; CES, cardioembolic stroke; DBP, diastolic blood pressure; HDL-C, high-density lipoprotein cholesterol; HF, heart failure; LAS, large artery stroke; LDL-C, low-density lipoprotein cholesterol; MI, myocardial infarction; SBP, systolic blood pressure; SVS, small vessel stroke; T2D, type 2 diabetes; TGL, triglycerides.

**Table S2. Characteristics of the genetic variants associated with depression**

| SNP         | Effect allele | Non-effect allele | Effect allele frequency | Chromosome | Position  | Gene          | Beta*   | Standard Error | P-value   |
|-------------|---------------|-------------------|-------------------------|------------|-----------|---------------|---------|----------------|-----------|
| rs301799    | T             | C                 | 0.5694                  | 1          | 8489302   | RERE          | -0.025  | 0.0035         | 1.356E-12 |
| rs1002656   | T             | C                 | 0.7033                  | 1          | 37192741  | RP4-614N24.1  | -0.0266 | 0.0038         | 3.739E-12 |
| rs1466887   | T             | C                 | 0.5511                  | 1          | 37709328  | RP5-1180C18.1 | -0.0199 | 0.0036         | 4.118E-08 |
| rs11579246  | A             | G                 | 0.9067                  | 1          | 50559162  | ELAVL4        | 0.0381  | 0.0061         | 5.706E-10 |
| rs1890946   | T             | C                 | 0.4671                  | 1          | 52342427  | NRDC          | -0.0235 | 0.0035         | 2.68E-11  |
| rs10789214  | T             | C                 | 0.5661                  | 1          | 67146817  | SGIP1         | 0.0193  | 0.0035         | 4.442E-08 |
| rs2568958   | A             | G                 | 0.6156                  | 1          | 72765116  | RPL31P12      | 0.0373  | 0.0036         | 8.473E-25 |
| rs10890020  | A             | G                 | 0.5156                  | 1          | 73668836  | RN7SKP19      | -0.0277 | 0.0035         | 4.028E-15 |
| rs113188507 | A             | G                 | 0.2838                  | 1          | 80809636  | AL606519.1    | 0.0221  | 0.0039         | 1.871E-08 |
| rs10913112  | T             | C                 | 0.3767                  | 1          | 175913828 | RFWD2         | -0.0264 | 0.0036         | 3.4E-13   |
| rs72710803  | A             | C                 | 0.9121                  | 1          | 177428018 | RP1-35C21.2   | -0.041  | 0.0062         | 5.289E-11 |
| rs169235    | A             | G                 | 0.753                   | 1          | 181740924 | CACNA1E       | -0.0229 | 0.0041         | 2.976E-08 |
| rs17641524  | T             | C                 | 0.2091                  | 1          | 197704717 | DENND1B       | -0.032  | 0.0043         | 1.522E-13 |
| rs12052908  | A             | T                 | 0.5325                  | 2          | 22503044  | N.A.          | -0.022  | 0.0035         | 4.436E-10 |
| rs1568452   | T             | C                 | 0.3851                  | 2          | 58012833  | ACTG1P22      | 0.0248  | 0.0036         | 8.118E-12 |
| rs7585722   | T             | C                 | 0.8458                  | 2          | 86819128  | RNF103-CHMP3  | -0.0269 | 0.0048         | 2.675E-08 |
| rs1226412   | T             | C                 | 0.7917                  | 2          | 157111313 | LINC01876     | 0.0256  | 0.0043         | 3.459E-09 |
| rs62188629  | A             | G                 | 0.3136                  | 2          | 208044470 | AC007879.1    | 0.0236  | 0.0038         | 7.127E-10 |
| rs4346585   | T             | C                 | 0.696                   | 3          | 44736493  | RP11-944L7.4  | -0.0236 | 0.0038         | 7.127E-10 |
| rs13084037  | A             | G                 | 0.774                   | 3          | 49214066  | KLHDC8B       | -0.0245 | 0.0042         | 7.084E-09 |
| rs7624336   | T             | G                 | 0.2087                  | 3          | 53244151  | AC097015.1    | 0.0238  | 0.0043         | 3.957E-08 |
| rs141954845 | A             | G                 | 0.388                   | 3          | 61192911  | FHIT          | 0.0229  | 0.0037         | 8.145E-10 |
| rs6783233   | T             | C                 | 0.2833                  | 3          | 117509984 | RP11-384F7.2  | 0.0218  | 0.0039         | 2.903E-08 |

---

|            |   |   |        |   |           |               |         |        |           |
|------------|---|---|--------|---|-----------|---------------|---------|--------|-----------|
| rs1095626  | T | C | 0.5799 | 3 | 157977962 | RSRC1         | -0.0264 | 0.0035 | 7.131E-14 |
| rs7685686  | A | G | 0.5753 | 4 | 3207142   | HTT           | 0.0202  | 0.0036 | 2.571E-08 |
| rs34937911 | T | C | 0.8838 | 4 | 42110353  | BEND4         | 0.0304  | 0.0055 | 4.13E-08  |
| rs45510091 | A | G | 0.9472 | 4 | 123186393 | KIAA1109      | 0.0448  | 0.008  | 1.826E-08 |
| rs35553410 | T | C | 0.7462 | 4 | 131237381 | RP11-404I7.1  | -0.0244 | 0.004  | 1.417E-09 |
| rs7659414  | A | C | 0.5782 | 4 | 177350956 | RN7SKP13      | -0.0201 | 0.0035 | 1.204E-08 |
| rs60157091 | T | C | 0.515  | 5 | 61509655  | AC010376.1    | 0.02    | 0.0035 | 1.421E-08 |
| rs3099439  | T | C | 0.5288 | 5 | 87545318  | TMEM161B      | -0.0276 | 0.0035 | 5.049E-15 |
| rs10061069 | C | G | 0.2212 | 5 | 93071630  | POU5F2        | -0.0275 | 0.0042 | 8.152E-11 |
| rs30266    | A | G | 0.3296 | 5 | 103972357 | RP11-6N13.1   | 0.0308  | 0.0037 | 1.445E-16 |
| rs11135349 | A | C | 0.4713 | 5 | 164523472 | CTC-340A15.2  | -0.0295 | 0.0035 | 6.042E-17 |
| rs200949   | A | G | 0.8744 | 6 | 27835435  | HIST1H1B      | 0.048   | 0.0053 | 2.525E-19 |
| rs9363467  | T | C | 0.6035 | 6 | 66565703  | RNU7-66P      | 0.0237  | 0.0036 | 6.437E-11 |
| rs7758630  | A | T | 0.4051 | 6 | 101387304 | RP3-359N14.1  | -0.0225 | 0.0036 | 5.56E-10  |
| rs1933802  | C | G | 0.4536 | 6 | 105365891 | LIN28B-AS1    | -0.0223 | 0.0035 | 2.567E-10 |
| rs2876520  | C | G | 0.5271 | 6 | 142996618 | AL356739.1    | -0.023  | 0.0036 | 2.294E-10 |
| rs725616   | T | C | 0.3644 | 6 | 147950422 | SAMD5         | 0.0204  | 0.0036 | 1.871E-08 |
| rs2029865  | A | T | 0.4534 | 6 | 165121844 | XX-C2158C12.1 | -0.0201 | 0.0035 | 1.204E-08 |
| rs3823624  | T | C | 0.8067 | 7 | 2110346   | MAD1L1        | 0.0272  | 0.0045 | 1.992E-09 |
| rs2043539  | A | G | 0.4177 | 7 | 12253880  | TMEM106B      | 0.0273  | 0.0035 | 9.893E-15 |
| rs2247523  | C | G | 0.5319 | 7 | 82454404  | PCLO          | -0.0207 | 0.0035 | 4.377E-09 |
| rs16887442 | T | C | 0.4347 | 7 | 82936909  | AC079799.2    | 0.0203  | 0.0035 | 8.621E-09 |
| rs58104186 | A | G | 0.4689 | 7 | 109099919 | AC073071.1    | 0.0237  | 0.0035 | 1.819E-11 |
| rs7807677  | T | C | 0.5505 | 7 | 117502574 | CTTNBP2       | 0.0237  | 0.0035 | 1.819E-11 |
| rs7837935  | T | G | 0.1522 | 8 | 65562019  | CYP7B1        | -0.0292 | 0.0049 | 3.343E-09 |
| rs67436663 | C | G | 0.2402 | 8 | 71347626  | RP11-333A23.1 | -0.0259 | 0.0042 | 9.374E-10 |

---

|            |   |   |        |    |           |               |         |        |           |
|------------|---|---|--------|----|-----------|---------------|---------|--------|-----------|
| rs1354115  | A | C | 0.6243 | 9  | 2983774   | CARM1P1       | 0.021   | 0.0036 | 7.084E-09 |
| rs1982277  | T | C | 0.7594 | 9  | 11513019  | RP11-32D4.1   | 0.0279  | 0.0041 | 1.447E-11 |
| rs263645   | A | T | 0.5438 | 9  | 17016503  | RP11-132E11.2 | 0.0221  | 0.0035 | 3.699E-10 |
| rs3793577  | A | G | 0.4665 | 9  | 23737627  | ELAVL2        | -0.0229 | 0.0035 | 8.411E-11 |
| rs59283172 | A | G | 0.1069 | 9  | 25232978  | RN7SKP120     | -0.0329 | 0.0057 | 1.016E-08 |
| rs34653192 | C | G | 0.3196 | 9  | 31124452  | RP11-572H4.1  | -0.0229 | 0.0038 | 2.225E-09 |
| rs7030813  | T | C | 0.3736 | 9  | 36999369  | PAX5          | 0.0253  | 0.0036 | 3.074E-12 |
| rs10817969 | T | G | 0.7173 | 9  | 119731045 | ASTN2         | 0.0261  | 0.0039 | 3.108E-11 |
| rs913930   | A | G | 0.6433 | 9  | 120484009 | TLR4          | -0.0208 | 0.0037 | 2.421E-08 |
| rs2670139  | T | C | 0.7609 | 9  | 126634255 | DENND1A       | -0.0266 | 0.0041 | 1.207E-10 |
| rs997934   | T | C | 0.3795 | 10 | 1795194   | ADARB2        | 0.0198  | 0.0036 | 4.812E-08 |
| rs1021363  | A | G | 0.3547 | 10 | 106610839 | SORCS3        | 0.0303  | 0.0037 | 4.406E-16 |
| rs1448938  | A | G | 0.4171 | 11 | 30892824  | DCDC1         | 0.0214  | 0.0035 | 1.297E-09 |
| rs2509805  | T | C | 0.3209 | 11 | 57650796  | RP11-734C14.2 | 0.022   | 0.0038 | 9.17E-09  |
| rs198457   | T | C | 0.1925 | 11 | 61471678  | DAGLA         | -0.0292 | 0.0046 | 2.986E-10 |
| rs58621819 | A | T | 0.7903 | 11 | 65314830  | LTBP3         | -0.0245 | 0.0043 | 1.565E-08 |
| rs7117514  | A | G | 0.5417 | 11 | 70544937  | SHANK2        | -0.0204 | 0.0035 | 7.286E-09 |
| rs7932640  | T | C | 0.4417 | 11 | 88744425  | GRM5          | 0.0281  | 0.0035 | 1.62E-15  |
| rs61902811 | A | G | 0.3682 | 11 | 113370758 | DRD2          | -0.0257 | 0.0036 | 1.395E-12 |
| rs2187490  | T | G | 0.9106 | 11 | 118713180 | Y_RNA         | -0.0338 | 0.0061 | 3.824E-08 |
| rs57344483 | A | G | 0.9259 | 11 | 127022560 | CTD-2234N14.2 | -0.038  | 0.0068 | 1.818E-08 |
| rs78337797 | T | G | 0.8781 | 12 | 23987925  | SOX5          | 0.0306  | 0.0055 | 3.365E-08 |
| rs56314503 | T | G | 0.7487 | 12 | 84465022  | SNORA3        | -0.0254 | 0.004  | 2.945E-10 |
| rs10774600 | T | C | 0.1656 | 12 | 110741356 | ATP2A2        | -0.0267 | 0.0048 | 3.387E-08 |
| rs3213572  | A | G | 0.4745 | 12 | 121205078 | SPPL3         | 0.0217  | 0.0035 | 7.612E-10 |
| rs1409379  | T | C | 0.7641 | 13 | 31907741  | B3GLCT        | 0.0249  | 0.0041 | 1.671E-09 |

---

|             |   |   |        |    |           |               |         |        |           |
|-------------|---|---|--------|----|-----------|---------------|---------|--------|-----------|
| rs1343605   | A | C | 0.384  | 13 | 53647048  | OLFM4         | 0.0313  | 0.0036 | 6.229E-18 |
| rs9592461   | A | G | 0.4874 | 13 | 66941792  | PCDH9         | 0.0216  | 0.0035 | 9.1E-10   |
| rs9545360   | A | C | 0.1807 | 13 | 80826373  | SPRY2         | -0.0271 | 0.0046 | 5.021E-09 |
| rs4772087   | T | C | 0.3732 | 13 | 99115041  | STK24         | 0.0227  | 0.0036 | 3.911E-10 |
| rs61990288  | A | G | 0.5083 | 14 | 42074726  | LRFN5         | -0.026  | 0.0035 | 1.681E-13 |
| rs1956373   | T | G | 0.7436 | 14 | 60141822  | RTN1          | -0.0226 | 0.004  | 2.059E-08 |
| rs1152578   | T | C | 0.4357 | 14 | 64697037  | ESR2          | -0.0218 | 0.0035 | 6.363E-10 |
| rs1045430   | T | G | 0.4792 | 14 | 75130235  | AREL1         | -0.0253 | 0.0035 | 7.308E-13 |
| rs10149470  | A | G | 0.4869 | 14 | 104017953 | BAG5          | -0.0267 | 0.0035 | 3.718E-14 |
| rs8037355   | T | C | 0.5556 | 15 | 37643831  | RP11-720L8.1  | -0.0233 | 0.0035 | 3.936E-11 |
| rs34488670  | T | C | 0.7887 | 15 | 47684936  | SEMA6D        | -0.0252 | 0.0043 | 6.033E-09 |
| rs7193263   | A | G | 0.6679 | 16 | 6315880   | RBF0X1        | -0.0239 | 0.0038 | 4.331E-10 |
| rs7198928   | T | C | 0.6159 | 16 | 7666402   | rs7198928     | 0.0239  | 0.0036 | 4.447E-11 |
| rs7200826   | T | C | 0.2551 | 16 | 13066833  | SHISA9        | 0.028   | 0.004  | 3.739E-12 |
| rs56887639  | A | G | 0.7264 | 16 | 13755530  | U95743.1      | -0.0278 | 0.0039 | 1.506E-12 |
| rs12923444  | A | C | 0.5625 | 16 | 21639710  | METTL9        | -0.0214 | 0.0035 | 1.297E-09 |
| rs75581564  | A | G | 0.1165 | 17 | 27363750  | PIPOX         | 0.0301  | 0.0054 | 3.172E-08 |
| rs12967855  | A | G | 0.3295 | 18 | 35138245  | CELF4         | 0.0265  | 0.0037 | 1.18E-12  |
| rs7227069   | A | G | 0.4326 | 18 | 50731802  | DCC           | 0.0238  | 0.0035 | 1.497E-11 |
| rs62091461  | T | C | 0.2274 | 18 | 52488672  | RAB27B        | -0.0254 | 0.0042 | 1.954E-09 |
| rs12966052  | C | G | 0.1805 | 18 | 52751639  | LINC01929     | -0.0314 | 0.0046 | 1.252E-11 |
| rs12967143  | C | G | 0.6984 | 18 | 53099012  | TCF4          | -0.0312 | 0.0038 | 3.699E-16 |
| rs7241572   | A | G | 0.201  | 18 | 77580712  | RP11-154H12.3 | 0.028   | 0.0044 | 2.698E-10 |
| rs33431     | T | C | 0.6144 | 19 | 30939989  | ZNF536        | 0.0198  | 0.0036 | 4.812E-08 |
| rs143186028 | T | G | 0.1778 | 20 | 39997404  | EMILIN3       | 0.0277  | 0.0046 | 2.288E-09 |
| rs12624433  | A | G | 0.2584 | 20 | 44680853  | SLC12A5       | 0.0233  | 0.004  | 7.441E-09 |

---



---

|           |   |   |        |    |          |           |         |        |         |
|-----------|---|---|--------|----|----------|-----------|---------|--------|---------|
| rs5995992 | T | C | 0.7155 | 22 | 41487218 | rs5995992 | -0.0266 | 0.0039 | 1.3E-11 |
|-----------|---|---|--------|----|----------|-----------|---------|--------|---------|

---

\*The beta coefficients represent the 1-unit change in the probability of getting depression for each additional effect allele.

**Table S3. Mendelian randomization associations of genetically predicted cardiovascular diseases with depression.**

| <b>Outcome</b> | <b>Risk factors</b>     | <b>SNP</b> | <b>IVW<br/>OR (95% CI)</b> | <b><i>p</i></b> | <b>MR-PRESSO<br/>OR (95%CI)</b> | <b><i>p</i></b> |
|----------------|-------------------------|------------|----------------------------|-----------------|---------------------------------|-----------------|
| Depression     | Coronary artery disease | 39         | 1.01 (1.00-1.03)           | 0.14            | 1.01 (0.99-1.03)*               | 0.20            |
|                | Myocardial infarction   | 23         | 1.01 (0.99-1.03)           | 0.50            | NA†                             | NA              |
|                | Heart failure           | 5          | 1.01 (0.97-1.05)           | 0.79            | 1.04 (0.97-1.12)‡               | 0.35            |
|                | Atrial fibrillation     | 90         | 1.00 (0.99-1.02)           | 0.71            | 1.00 (0.99-1.02)§               | 0.62            |
|                | Any Ischemic Stroke     | 9          | 1.02 (0.96-1.07)           | 0.54            | NA†                             | NA              |
|                | Large artery stroke     | 3          | 1.01 (0.97-1.05)           | 0.73            | NA†                             | NA              |
|                | Small vessel stroke     | 0          | /                          | /               | /                               | /               |
|                | Cardioembolic stroke    | 3          | 1.02 (0.99-1.05)           | 0.32            | NA†                             | NA              |

CI, confidence interval; OR, odds ratio; IVW, the inverse-variance weighted method; MR-PRESSO, MR-Pleiotropy Residual Sum and Outlier; NA, not available; SNP, single nucleotide polymorphism.

\*MR-PRESSO IV outliers detected: rs11191416 and rs663129.

†No outlier detected.

‡MR-PRESSO IV outliers detected: rs2234962.

§ MR-PRESSO IV outliers detected: rs2738413, rs62011291, rs72926475, and rs7978685.

**Figure S1. Diagram for the mediation analysis of the mediation effect of depression on coronary artery disease and myocardial infarction via type 2 diabetes mellitus, smoking or alcohol use.**

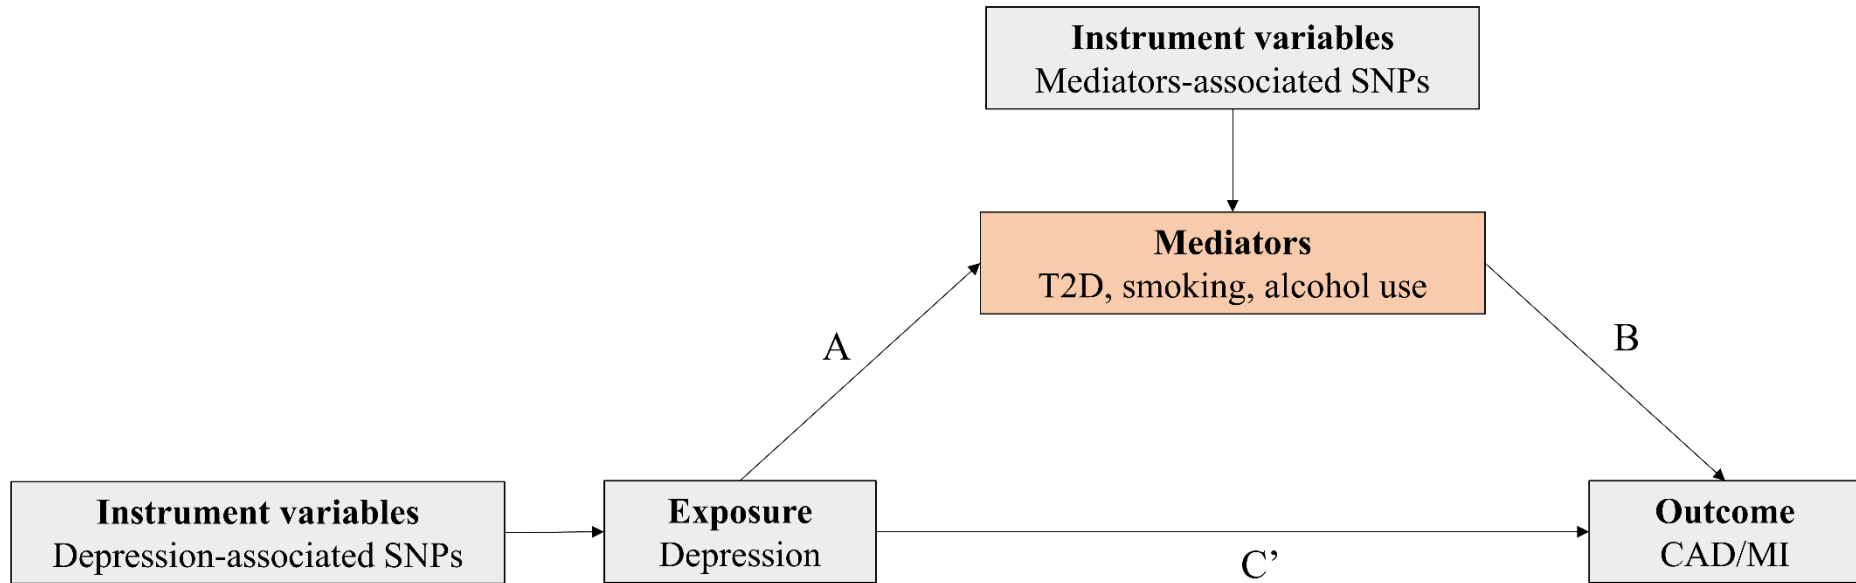

A, the effect of the depression on the mediator. B, the effect of the mediator on the outcome after adjusting for depression. C', the effect of depression on the outcome acting through the mediator. The mediation effect (C') is calculated by multiplying A times B. The standard error of mediation effect is calculated as

$$S_{C'} = C' \sqrt{\left(\frac{S_A}{A}\right)^2 + \left(\frac{S_B}{B}\right)^2}$$

with  $S_{C'}$ ,  $S_A$ ,  $S_B$  the standard errors of  $C'$ , A, B, respectively. The corresponding 95% confidence intervals are implemented as

$$95\% \text{ confidence intervals} = e^{C' - 1.96S_{C'}} \text{ to } e^{C' + 1.96S_{C'}}$$

CAD, coronary artery disease; MI, myocardial infarction; SNPs, Single nucleotide polymorphisms; T2D, type 2 diabetes mellitus.

**Figure S2. Scatter plots of SNP potential effects regarding the associations of genetically determined depression with (A) coronary artery disease and (B) myocardial infarction, with the slope of line corresponding to estimated MR effect derived from inverse-variance-weighted MR analyses.**

A

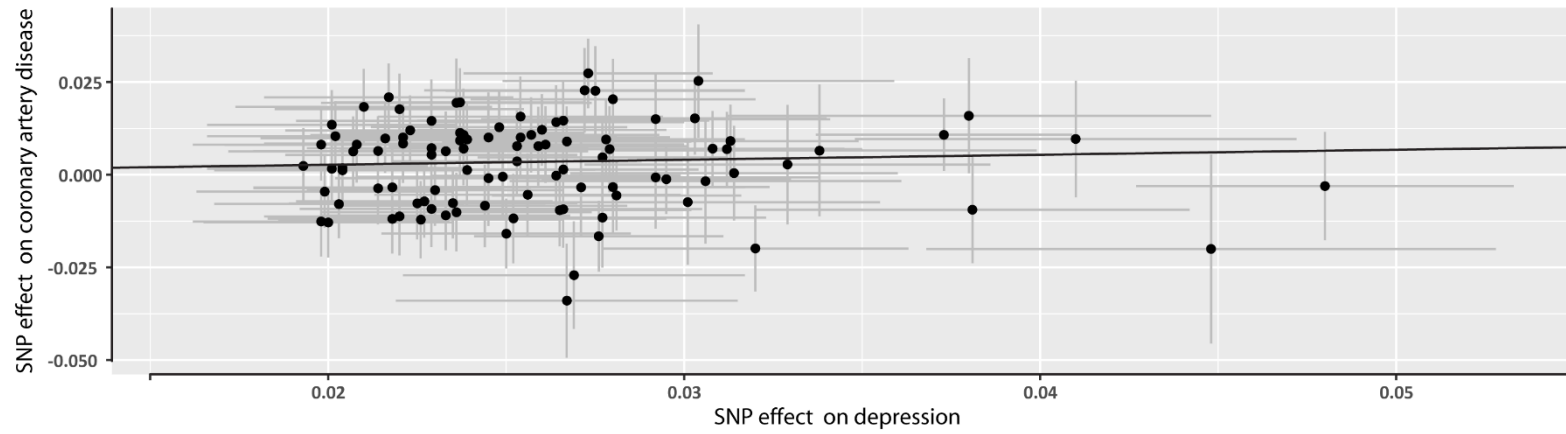

B

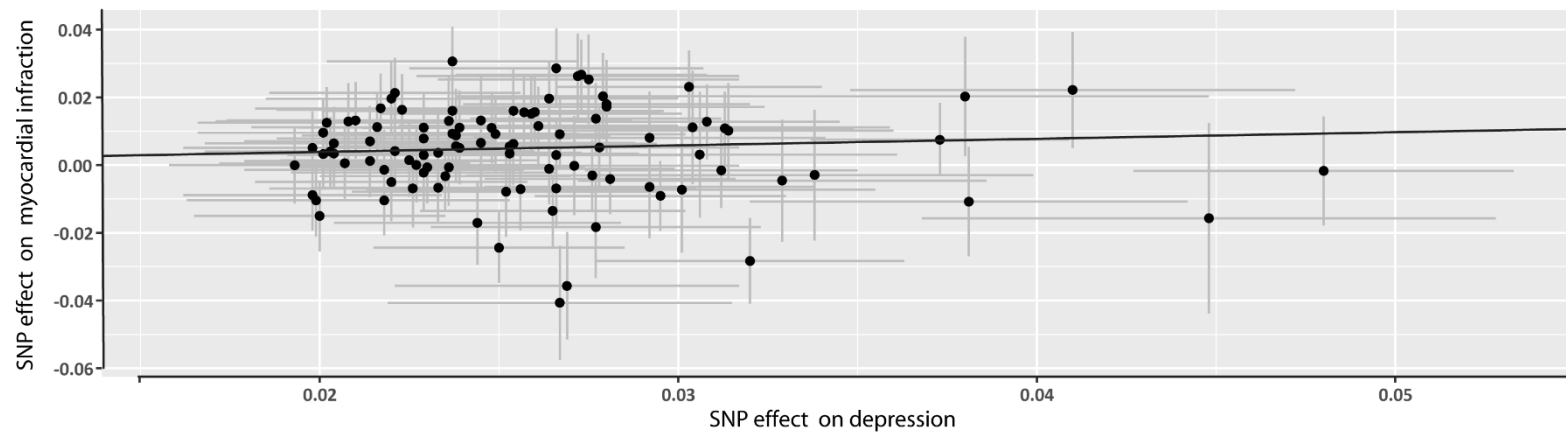

**Figure S3. Mendelian randomization association of genetically predicted depression with heart failure and atrial fibrillation.**

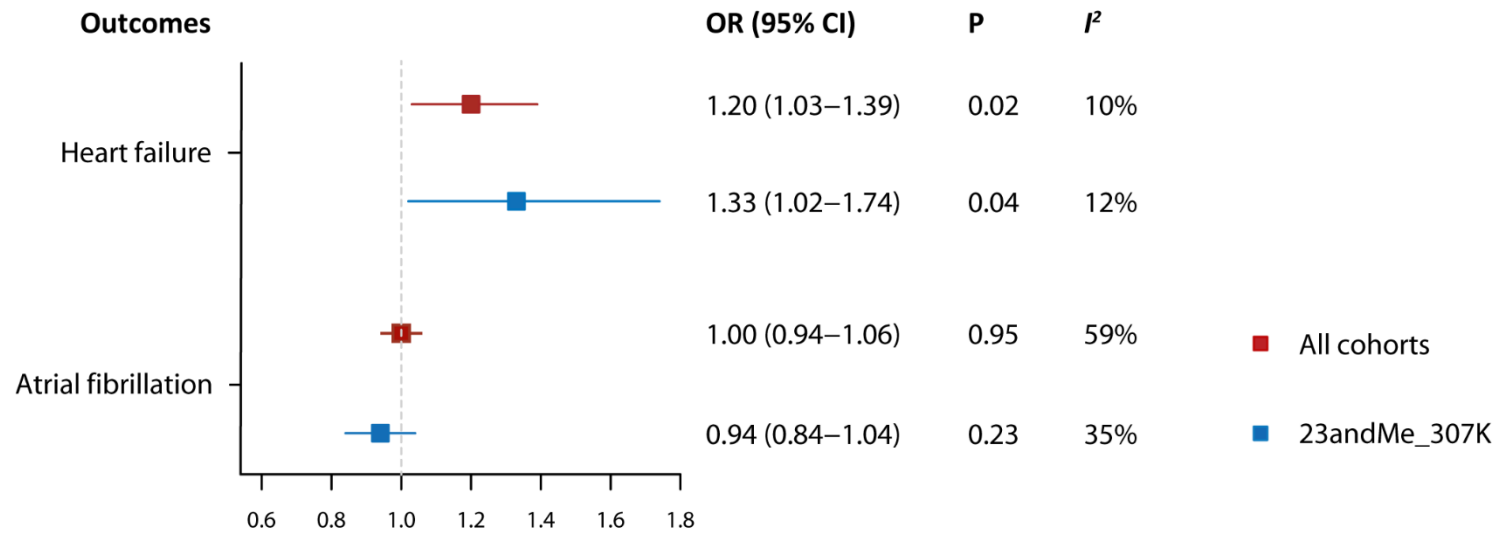

Odds ratios are scaled to per genetically predicted 2.72-fold (1 log-odds unit) increase in the liability to depression.  
CI, confidence interval; OR, odds ratio
